# Supplementary material
Source: PubMed Central journal article supplement (PMC2869550)
Supplement: jc.2009-2498_1.pdf [file jc.2009-2498_1.pdf]

**Supplementary Table 1.** Clinical characteristics of Caucasians and Africans Americans

undergoing coronary angiography.

| <b>Characteristics</b>                     | <b>Caucasians<br/>(n=336)</b> | <b>African Americans<br/>(n=224)</b> | <b>P-value</b> |
|--------------------------------------------|-------------------------------|--------------------------------------|----------------|
| Men/Women                                  | 217/119                       | 126/98                               | NS             |
| Hypertension (%)                           | 203(60%)                      | 165(73%)                             | 0.002          |
| Postmenopausal (%)                         | 92(79%)                       | 65(66%)                              | 0.032          |
| Smoking (%)                                | 77(23%)                       | 107(48%)                             | <0.001         |
| Alcohol (%)                                | 145(43%)                      | 61(27%)                              | <0.001         |
| <b>Anthropometric</b>                      |                               |                                      |                |
| Age (yrs)                                  | 56.8±10.3                     | 54.8±9.2                             | 0.025          |
| BMI (kg/m <sup>2</sup> )                   | 29.7±6.0                      | 28.6±6.1                             | 0.043          |
| Waist (cm)                                 | 104.9±17.3                    | 96.2±16.4                            | <0.001         |
| Systolic blood pressure (mm Hg)            | 125±18                        | 129±19                               | NS             |
| Diastolic blood pressure (mm Hg)           | 75±10                         | 78±13                                | 0.004          |
| <b>Metabolic</b>                           |                               |                                      |                |
| Total cholesterol (mg/dl)                  | 197±41                        | 198±45                               | NS             |
| LDL cholesterol (mg/dl)                    | 122±35                        | 126±42                               | NS             |
| HDL cholesterol (mg/dl)                    | 41±12                         | 49±17                                | <0.001         |
| Triglyceride (mg/dl)                       | 153 (114-222)                 | 106 (80-144)                         | <0.001         |
| Glucose (mg/dl)                            | 132±67                        | 119±52                               | 0.012          |
| Insulin (μU/ml)                            | 15.1 (9.2-26.0)               | 14.1 (8.9-21.7)                      | 0.041          |
| HOMA-IR                                    | 2.0 (1.3-3.5)                 | 1.9 (1.2-2.9)                        | 0.011          |
| ApoA-I (mg/dl)                             | 122±23                        | 130±28                               | <0.001         |
| ApoB (mg/dl)                               | 136±36                        | 134±40                               | NS             |
| Lp-PLA <sub>2</sub> mass (ng/mL)           | 288 (239-339)                 | 210 (180-243)                        | <0.001         |
| Lp-PLA <sub>2</sub> activity (nmol/min/mL) | 171 (146-201)                 | 137 (109-162)                        | <0.001         |
| Lp-PLA <sub>2</sub> index (nmol/min/ng)    | 0.61±0.17                     | 0.64±0.19                            | NS             |
| Composite score                            | 12.9 (1.7-27.1)               | 8.6 (1.5-25.1)                       | NS             |

NS, not significant. Data are means ± SD or for non-normally distributed variables as median (interquartile range). Group means were compared using *t*-test. Values for triglyceride, insulin, Lp-PLA<sub>2</sub> and composite score, were logarithmically transformed before analyses.

1 **Supplementary Table 2.** Epidemiological and clinical studies of the association between Lp-PLA<sub>2</sub> mass and activity and CVD.

| Investigators (study)                | Year | CV end point              | Population                               | Ethnicity                     | Lp-PLA <sub>2</sub> assay | No. of patients | Age criteria (y) | Risk (95% CI)       |
|--------------------------------------|------|---------------------------|------------------------------------------|-------------------------------|---------------------------|-----------------|------------------|---------------------|
| Packard et al, (2) (WOSCOPS)         | 2000 | Coronary events           | Men with hypercholesterolemia            | Caucasians                    | Mass                      | 1740            | 45-70            | RR 1.18 (1.05-1.33) |
| Blake et al, (6) (WHS)               | 2001 | Coronary events           | Healthy women                            | Caucasians                    | Mass                      | 246             | 45-70            | RR 1.17 (0.45-3.05) |
| Blankenberg et al, (8) (AtheroGene)  | 2003 | ACS and angina            | Subjects with CAD                        | Caucasians                    | Activity                  | 973             | ≥40              | OR 1.80 (1.01-3.20) |
| Ballantyne et al, (5) (ARIC)         | 2004 | Coronary events           | Healthy subjects                         | Caucasians, African Americans | Mass                      | 1348            | 45-64            | HR 1.15 (0.81-1.63) |
| Koenig et al, (4) (MONICA)           | 2004 | Coronary events           | Men with moderate hypercholesterolemia   | Caucasians                    | Mass                      | 934             | 45-64            | HR 1.21 (1.01-1.45) |
| Oei et al, (28) (Rotterdam Study)    | 2005 | Coronary events           | Healthy subjects                         | Caucasians                    | Activity                  | 2128            | ≥55              | HR 1.97 (1.28-3.02) |
| Iribarren et al, (27) (CARDIA study) | 2005 | Calcified coronary plaque | Young adults                             | Caucasians, African Americans | Mass and Activity         | 532             | 33-45            | OR 1.28 (1.03-1.60) |
| Koenig et al, (23) (KAROLA study)    | 2006 | Recurrent CV              | Post ACS or revascularization            | Caucasians                    | Mass and Activity         | 1051            | 30-70            | HR 2.09 (1.10-3.96) |
| Winkler et al, (29) (LURIC study)    | 2007 | Severe CAD                | Patients undergoing coronary angiography | Caucasians                    | Activity                  | 3232            | 43-76            | HR 2.03 (1.35-3.05) |
| Furberg et al, (30) (CHS)            | 2008 | MI                        | Elderly subjects                         | Caucasians, African Americans | Activity                  | 5531            | ≥65              | OR 1.12 (1.01-1.24) |
| Tsimikas et al, (31) (Bruneck Study) | 2009 | Incident CVD              | Healthy subjects                         | Caucasians                    | Activity                  | 765             | 45-84            | HR 2.2 (1.1-4.8)    |

2 RR, relative risk; HR, hazard ratio; OR, odds ratio; CAD, coronary artery disease; ACS, acute coronary syndrome; MI, myocardial infarction;
